**Maternity waiting home Utilization and associated factors among women who gave birth in the Digelu and Tijo district of the Arsi Zone, Oromia, Ethiopia.**

Derese Teshome<sup>1</sup>, Muluemebet Abera<sup>2</sup>, Mamo Nigatu<sup>2</sup>

---

<sup>1</sup>*Arsi Asella town Administrative*

<sup>2</sup>*Faculty of Public Health, Jimma University (JU)*

**Email Address:**

Derese Teshome (BSc, MPH): teshdere@gmail.com

Muluemebet Abera (MPH, PhD): *Associate Professor of RH, Jimma University*  
*Dean, Faculty of Public Health, Jimma University*: mulu\_abera.ts2009@yahoo.com

Mamo Nigatu (MPH): mamogebre14@gmail.com

**\*Corresponding Author detail:**

Name: Derese Teshome

Address: Arsi, Asella, Ethiopia

Cell phone: +251-911-9974-54

Email: teshdere@gmail.com

## **Abstract**

**Background:** Maternity Waiting Homes (MWHs) is an intervention designed to reduce maternal and perinatal mortality. Ethiopia has introduced the intervention before three decades however; its utilization is very low. Therefore, this study is aimed to assess MWH utilization and associated factors among women who gave birth in the last 12 months in Digelu and Tijo district Arsi Zone Oromia Region, Ethiopia.

**Methods:** Community-based cross-sectional study was conducted in April 2019 on 530 randomly selected women. Data were collected by face-to-face interview using structured questionnaire. Descriptive statistics and logistics regressions were used to analyze the results. Adjusted odds ratio and 95% confidence interval were respectively calculated to measure strength of association and its statistical significance. The confidence interval was used to declare statistical significance in the final model.

**Results:** One hundred twenty-five (23.6%) of the respondents used maternity waiting home. Traveling time less than and equals to 60 minutes from a nearby health facility (AOR=0.16, 95% CI: 0.09, 0.27), women's decision power (AOR=1.81, 95% CI: 1.10, 2.96), not utilizing antenatal care (AOR=0.6, 95% CI: 0.37, 0.97) and delivering more than three children (AOR=0.56, 95% CI: 0.34, 0.90) were independently associated with utilizing the maternity waiting home.

**Conclusion:** Even though the MWH was designed to reduce maternal and perinatal mortality, less than a quarter (23.6%) of women delivered in the last 12 months before the study in the Digelu and Tijo District had utilized the services. Increasing availability of the service, promoting antenatal care utilization, empowering women and evolving policy makers are recommended to enhance the current low utilization of the MWH.

**Keywords:** Maternity Waiting Home, Digelu and Tijo district, South East Ethiopia

## **Background of the study**

Maternity waiting homes (MWHs) have been existed since the early 20th century in the world, particularly in remote rural areas where women have limited access to an obstetric facility. It introduced into developing countries in the 1960's. MWHs are residential facilities located near a hospital or a health center to accommodate women in their final weeks of pregnancy to bridge the geographical gap (1–3). According to World Health Statistics 2015 released by the World Health Organization every year some 303,000 women die of complications during pregnancy or childbirth globally. About 830 women die from pregnancy- or childbirth-related complications around the world every day. Developing regions accounted for approximately 99% (302 000) of the estimated global maternal deaths in 2015, and Sub-Saharan Africa alone roughly accounted for 66% (201 000) (4). The establishment of MWH has contributed to reduction of maternal mortality ratio and the stillbirth rate(5–7). According to the 2016 Ethiopian Demographic and Health Survey (EDHS), only 28% of delivering women had attended skilled birth attendants(SBA) at national level whereas, only one in five ( 20%) delivering women has attended the SBA in the Oromia region; Although the maternal mortality ratio has decreased in Ethiopia, it is still very high and access to the emergency obstetrical care is still limited(4). From the study done at Jinka Hospital, southern Ethiopia, 16.7% of the total 516 mothers who were delivered at Jinka hospital were admitted to the MWHs. The MWH was established in 2006; however, it was not well-utilized. Almost all the mothers from the MWHs (98.8%) had delivered at the hospital. Women who had used the MWHs were less likely to experience prolonged PROM, intrauterine fetal death (IUFD) or stillbirth, obstructed labor, Uterine rupture and maternal death(2,8,9). The Maternity waiting home (MWH) utilization has reduced the maternal risk of perinatal death and other related social and economic impact by nearly 50 % as compared to the risk among those who did not utilized it. If women manage to stay in a MWH, immediate access to emergency obstetric care, if required, should be guaranteed(7,10). Studies done at the different countries and few studies from Ethiopia revealed that the utilization of the MWH utilization decreases the maternal morbidity and mortalities(7,11–13). Even though the MWH utilization is proven effective in reducing the maternal and perinatal mortality by different studies done internationally and in Ethiopia, as to the best knowledge of the investigators, its utilization and associated factors are not well studied in the Digelu and Tijo district of Arsi Zone, Ethiopia. Therefore, the current study is aimed at determining the magnitude of the MWH utilization and its associated factors among women who gave birth within the last 12 months at Digelu and Tijo district, South East of Ethiopia, which may be used as baseline for stakeholder to solve the problem.

## **Methods and Materials**

### ***Study setting and period***

A Community-based cross-sectional study was conducted on women who gave birth in the last 12 months in Digelu and Tijo district. The Digelu and Tijo district is one of the districts in the Arsi Zone of Oromia Region, Ethiopia. It is located at 183 km from Addis Ababa to the south-east. Administratively; the district was subdivided into 28 rural and 2 urban Kebeles which is the lower administrative unit in Ethiopia. The total population of the District, as projected from the 2007 census, was 190,814 of which 88.4% were rural residents, 50.9% were females and 22.9% were women of childbearing age. The district has 5 governmental health centers while 4 of which health centers have the MWHs, while two of them were functional. The district has also currently 23 functional health posts, 49 rural health extension workers, 42 Diploma nurses, 13 midwives, 7 BSc nurses and 10 health officers. The study was conducted in April, 2019.

### **Inclusion criteria**

Women who gave birth within the last 12 months and live more than 6 months in the Digalu and Tijo district.

### **Exclusion criteria**

Those women who had difficulty in communication due-to severe illness or unable to respond.

### **Sample size determination and Sampling procedure**

The sample size was determined using epi-info version 7.2.2.6, with the assumptions of 95% confidence level, 5% margin of error, 80% power, a design effect of 1.5 and after reviewing different similar studies, 38.7% proportion of MWHs utilization from the study done at Jimma (8) selected which yields highest sample size. Then, the Sample size was calculated to be 507, and by considering a 10% of non-response rate, the final sample size was 558 women. There are 28 kebeles in the district (23 rural and 5urban), and all the kebeles (the lowest administrative level) were stratified into urban and rural kebeles. A total of 9 kebeles, 2 from the urban kebeles and 7 from the rural kebeles were randomly selected. Based on the reports from the HEWs and kebele administrators, there were a total of 1832 households with eligible women in the selected 9 kebeles. The study participants were selected by systematic random sampling with a sampling interval of three households. The first household was randomly chosen by drawing a random number. In a case selected household was closed or eligible woman was not available at home at the point of data collection, frequent visits were exhaustively made to get the missing women for the interview, and lastly, the next household was selected. In case there was more than one eligi-

ble woman in the same household, one eligible woman was randomly selected by the lottery method.

### **Data collection procedure and data quality control**

Structured interviewer administered questionnaire, which was originally prepared in English and translated to the local language Oromiffa was used. The questionnaire used for MWH users and non-MWH users was different in content. To assure the quality of the data, properly designed data collection instruments were developed in English after thoroughly revising related literatures(3,8,12,14–17) and contextualized to suit to the research objective, local situations and language. The English version of the questionnaire was translated to Oromiffa and translated back to English to check consistency by language expert. Before the actual data collection, the questionnaire was pre-tested on 5% (28) women who had given birth within the last 12months in the neighboring district Tiyo on those who were not finally included to the study. The study subjects were interviewed about their socio-demographic, socio-cultural, reproductive & obstetric health related variables and maternity waiting home service-related variables. Six females who are diploma in midwifery and two diploma nurses who are fluent in both Oromiffa and local language Amharic were recruited for the actual data collection. The data collectors had checked the completeness of the collected data and reported the problems encountered to the investigator. Two-day training was given to the data collectors on general approaches of the data collection and on the questionnaires used for the survey including the procedures, the techniques and ways of expressing the questionnaires to collect the necessary information. Every day the completeness and consistency of the collected data were checked by the investigator. The investigator had made discussions with the data collectors at the end of every data collection day and took timely corrective actions to minimize any possible errors that might have been committed during interviews.

### ***Operational definitions***

**MWH utilization:** In this study, a woman was considered as utilizer of the MWH if she had stayed at any of the MWH in the Digalu and Tijo district until delivery, when she was near to her

term or at her term irrespective of her length of stay in the home during her previous pregnancy.

**NB:** Mothers with true labor will not be admitted to the MWH.

**MWH:** A homes or residential facilities located near a hospital or a health center to accommodate women in their final weeks of pregnancy and that provides antenatal care with skilled birth attendants and emergency obstetric care.

**Travel time to MWH:** The time it takes the pregnant women in hour, to arrive to the nearby MWH when travelling on-foot (it will be considered fair if it is equal and less one hour and distant if takes more than one hour on foot)(18).

**Income of family:** It is family's monthly income in Ethiopian birr by adding woman's income, husband's and other family members' income if there is any from all their income sources (it was considered as low income if the family gets <1000 ETB per month, medium if the family gets 1000-1500 ETB per month medium income, and high if the family gets >1500 ETB per month)(19).

**Recreational facilities:** Availability of one of the facilities like; Telezion, Radio, coffee ceremony, porridge and open garden which is separated from health center and coffee ceremony at MWH.

**Woman's decision-making autonomy:** The woman's authority to decide on maternal cares she wants and an authority to use money without a permission of her husband for transport and other costs.

### ***Data analysis procedures***

The collected data were checked for completeness, coded, cleaned, edited and entered into epi-info version 7.2.2.6. Then data were exported to SPSS version 21.0 for analysis. The descriptive data were summarized using descriptive statistics. Binary logistic regression was used to assess the existence of association between independent variables and maternity waiting home utilization. The variables in a bivariate analysis at the  $p\text{-value} < 0.25$  were entered to the multivariable logistic regression model to determine predictors of MWH utilization. Odds ratios and 95% confidence intervals were respectively used to measure the strength of statistical associations and their statistical significance. Confidence interval was used to declare statistical significance at final model.

### ***Ethical clearance***

Ethical clearance was obtained from the Institutional Review Board (IRB) of Jimma University (JU) Institute of Health, school of Post-Graduate Studies. Letter of cooperation was obtained from Digelu and Tijo district to communicate with respective administrative bodies in the study area. After getting letter of permission to carry out the study, from each administrative body, the aim and purpose of the study were explained to each study participants including procedures, potential risks and benefits. Finally verbal consent was obtained from the participants. Confidentiality of the information assured and the data was collected in a way that prevents a person from being identified by name. The respondents had the right to refuse participation or terminate their involvement at any time they want was assured.

### **Results**

A total of 530 women who gave birth in the last 12 months were interviewed from two urban and seven rural kebeles making the response rate of 95%. One hundred ninety-seven (37.2%) of respondents were in the age group of 25-29 years with the mean age of  $28.7 \pm 5.8$  years. Majority of the respondents, 384 (72.5%), had no formal education while 17.2% had attained primary school. Regarding marital status, nearly three-fourth 388 (73.2%) of the participants were housewives and 504 (95.1%), were married (table-1).

### ***MWH utilization facility related factors***

One hundred twenty-five (23.6%) study participants had utilized MWH. Of those, 354 (67.80%) had awareness about MWH. Almost all, 99.2% of MWH users reported that there was no electric power, 130 (90.4%) of the MWH users reported that there was no bathroom at MWH. Among MWH users, most of them came to MWH facility by Ambulance 68.8% of users (Table-2). Among non-MWH users (405); absence of someone who cares children at home (31.5%), past favourable condition during home delivery (26.2%) and no means of transport (20%); were reported as major challenges for not using MWH (figure-1).

### ***Reproductive/Obstetrics History and socio-cultural related factors***

This study showed that among 530 respondents majority, 369(69.6%) did not have decision making autonomy to utilize MWH, rather discuss the issue with husbands or other family members even though the final decision is up to their husbands (Table-3).

### ***Factors associated with MWH***

Bivariate analysis was done to select potential candidate variables for final multivariable analysis and variables with p-value <0.25 were selected as a candidate variable. Accordingly; residence, occupation, traveling time, ANC use, decision making power and number of deliveries were candidate for multivariable logistic regression (Table 4).

Multivariable logistic regression was fitted to identify independent predictors of MWH utilization. Accordingly; traveling time of more than 60 minutes from a nearby MWH, woman's decision making autonomy, having greater than three children and antenatal care (ANC) utilization were associated with the MWH utilization after adjusting for other potential confounding variables. A woman who travels less than or equals to 60minutes on-foot to arrive to nearby MWH was 84% less likely utilize the MWH when compared to a woman who travels >60minutes on-foot to arrive to nearby MWH facility (AOR 95% CI 0.16(0.09-0.27)). A woman who gave birth for more than three children was 44% less likely to utilize the MWH when compared to a woman who gave birth for less than three children (AOR 95% CI 0.56(0.34-0.90)). A woman who had decision making autonomy in a household was nearly 2 times more likely to utilize the MWH as compared to a woman who had not the autonomy (AOR 95% CI 1.81(1.10-2.96)). A women who had not ANC follow-up was 40% less likely to utilize the MWH as compared to a woman who had ANC follow-up during her last pregnancy (AOR 95% CI 0.6(0.37-0.97)) (table.4).

### **Discussion**

The current study revealed that, less than one-fourth (23.6%) of the women who gave birth in the last 12 months prior to the survey had utilized the MWHs. This result was lower than the findings from the studies done in Jimma (Gomma) and Gurage zone (Attat), where 37.8% and 28.2% of the women had utilized the MWH respectively(8,20). The difference might be attributed to the better preparedness of the MWHs in all health centers of Jimma district and better facilities at Gurage zone because they are the areas where the MWH were started in Ethiopia three decades back. In the other way, the result from the current study is higher than the findings from the study done at Jinka Hospital, southern Ethiopia, which was 16.7%(9). The difference might be better awareness



among women at this study area because of the time of study and relatively better availability of transportation access at this study area.

This study showed that, a woman who travels less than or equals to sixty minutes on-foot to arrive to nearby MWH was less likely utilize the MWH when compared to a woman who travels more than sixty minutes on-foot to arrive to nearby MWH facility. This result is indifferent with study done in Kenya (12). The differences might be different socio-cultural issue, geographical background and fear of distance to travel to the health facility during emergency in this study. According to this study, majority of the MWH users lived at a distance of more than 20 kilometers from MWHs. This result also agrees with study done at Jinka(Ethiopia), Tanzania and Zambia(9,15,21).

Decision making autonomy in a household was more likely to utilize the MWH as compared to a woman who had not the autonomy, this result is in line with the study done in Zambia(15), where women who had decision making autonomy used the MWH better when compared with those who had no decision making autonomy. In this study there is no association between MWH utilization and education level which is not similar with the study done at Attat Hospital southern Ethiopia(22), where educational level was associated with MWH utilization; The difference is might be the participants of this study were nearly in the same educational status ranges.

A woman who gave birth for more than three children was less likely to utilize the MWH when compared to a woman who gave birth for less than three children women those who experiencing less than three deliveries will use MWH utilization. This result is different from study done at southern Ethiopia (23),Where there is no association between parity and MWH utilization. The reason might be as woman familiar with repeated birth they don't fear the risk of giving birth at home.

ANC users were likely utilizing the MWH as compared to a woman who hadn't ANC follow up during her last pregnancy. This result agrees with the qualitative result from study done at Ifakara, Tanzania(24).This result is similar with the study done at rural health centers of southern Ethiopia(2,17). The study cannot allow the establishment of cause and effect relationships as study is cross-sectional.

## **Conclusions**

Based on this, woman who comes from areas where it takes a traveling time more than one hour, woman who had decision making autonomy about her health, antenatal care users, ANC users and

woman who gave births for less than three children were MWHs users. It is required to work on approaches that improve the attendance of recommended ANC visits, provide information as every pregnancy at risk and giving greater attention to empowering women in decision making and economically as well as making the MWH attractive and Involving policy makers are other important activity to improve MWHs utilization.

### **Abbreviations**

ANC: Antenatal Care; AOR: Adjusted Odd Ratio, COR: Crude Odd ratio; ETB: Ethiopian birr; MWHs: Maternity Waiting Homes.

### **Declarations**

#### **Consent for publication**

It is not applicable.

#### **Availability of data and materials**

The datasets that used in this study for analysis and other information are available currently on the hands of corresponding author and principal investigator. Therefore, I can provide it if requested.

#### **Declaration of interest**

There were no conflicts of interests for any of the authors.

#### **Author Contributions:**

DT conceived and DT, MA, MN designed the study. DT, MA and MN performed analysis and interpretation of the data. DT prepared the manuscript.

#### **Acknowledgments**

We would like to thank Jimma University, for its financial support. Our thanks also extend to Digeluna and Tijo districts Health Office for their support. Lastly my thanks go to data collectors and all research participants who took part in the study.

### **REFERENCES**

1. Partners in Health. The role of maternity waiting homes as part of a comprehensive maternal mortality reduction strategy in Lesotho. Pih Reports. 2013;1(1).
2. Tiruneh GT, Taye BW, Karim AM, Betemariam WA, Zemichael NF, Wereta TG, et al. Maternity waiting homes in Rural Health Centers of Ethiop: The situation, women's

- experiences and challenges. *Ethiop J Heal Dev.* 2016;30(1):19–28.
3. Bayu BB, Aline U. Maternity waiting homes and skilled delivery in Ethiopia: Review of strategy and implementation to drive sustainable development goals. *Med Pract Rev.* 2018;9(3):19–26.
  4. Central Statistical Agency [Ethiopia]. Demographic and Health Survey 2016 Key Indicators Report. Ethiopians Water Sector Development Program. Addis Ababa; 2016. 1–49 p.
  5. Van Lonkhuizen L, Stekelenburg J, Van Roosmalen J. Maternity waiting facilities for improving maternal and neonatal outcome in low-resource countries. *Cochrane Database Syst Rev.* 2009;(3).
  6. Elmusharaf K, Byrne E, O'Donovan D. Strategies to increase demand for maternal health services in resource-limited settings: Challenges to be addressed. *BMC Public Health.* 2015;15(1):1–10.
  7. Sialubanje C, Massar K, Van Der Pijl MSG, Kirch EM, Hamer DH, Ruiter RAC. Improving access to skilled facility-based delivery services: Women's beliefs on facilitators and barriers to the utilisation of maternity waiting homes in rural Zambia. *Reprod Health.* 2015 Jul 8;12(1).
  8. Endalew GB, Gebretsadik LA, Gizaw AT. Intention to use Maternity Waiting Home among Pregnant Women in Jimma District, Southwest Ethiopia. *Glob J Med Res.* 2016;16(6):34–5.
  9. B M, G D, T H. The Role of Maternity Waiting Area in Improving Obstetric Outcomes: A Comparative Cross-sectional Study, Jinka Zonal Hospital, Southern Regional State. *J Womens Heal Care.* 2017;06(06).
  10. Buser JM, Lori JR. Newborn Outcomes and Maternity Waiting Homes in Low and Middle-Income Countries: A Scoping Review. *Matern Child Health J.* 2017;21(4):760–9.
  11. Sialubanje C, Massar K, Hamer DH, Ruiter RAC. Personal and environmental factors associated with the utilisation of maternity waiting homes in rural Zambia. *BMC Pregnancy Childbirth.* 2017;17(1).
  12. Abdulkadir RW. Awareness, attitude towards and utilization of maternity waiting home by

- mothers in Merti sub county, Isiolo Country. *Int J Gynecol Obstet.* 2017;23(43):36.
13. Scott NA, Kaiser JL, Vian T, Bonawitz R, Fong RM, Ngoma T, et al. Impact of maternity waiting homes on facility delivery among remote households in Zambia: Protocol for a quasiexperimental, mixed-methods study. *BMJ Open.* 2018;8(8):e022224.
  14. Dadi TL, Bekele BB, Kasaye HK, Nigussie T. Role of maternity waiting homes in the reduction of maternal death and stillbirth in developing countries and its contribution for maternal death reduction in Ethiopia□: a systematic review and meta- analysis. 2018;1–10.
  15. Sialubanje C, Massar K, Hamer DH, Ruiter RAC. Personal and environmental factors associated with the utilisation of maternity waiting homes in rural Zambia. *BMC Pregnancy Childbirth.* 2017;17(1):1–14.
  16. Tiruneh GT, Taye BW, Karim AM, Betemariam WA, Zemichael F, Wereta TG, et al. Original article Maternity waiting homes in Rural Health Centers of Ethiop□: The situation , women ’ s experiences and challenges.
  17. Vermeiden T, Braat F, Medhin G, Gaym A, van den Akker T, Stekelenburg J. Factors associated with intended use of a maternity waiting home in Southern Ethiopia: A community-based cross-sectional study. *BMC Pregnancy Childbirth.* 2018;18(1):1–9.
  18. Spangler SA, Barry D, Sibley L. An evaluation of equitable access to a community-based maternal and newborn health program in rural Ethiopia. *J Midwifery Women’s Heal.* 2014;59(SUPPL1):S101–9.
  19. Ther JND. *Journal of Nutritional Disorders & Therapy* Knowledge and Attitude on Growth Monitoring and its Associated Factors among Mothers / Guardians of Children Less than Two Years in Areka. 2017;7(3).
  20. Kelly J, Kohls E, Poovan P, Schiffer R, Redito A, Winter H, et al. The role of a maternity waiting area (MWA) in reducing maternal mortality and stillbirths in high-risk women in rural Ethiopia. *BJOG An Int J Obstet Gynaecol.* 2010 Oct;117(11):1377–83.
  21. Fogliati P, Straneo M, Mangi S, Azzimonti G, Kisika F, Putoto G. A new use for an old tool: Maternity waiting homes to improve equity in rural childbirth care. Results from a cross-sectional hospital and community survey in Tanzania. *Health Policy Plan.*

2017;32(10):1354–60.

22. Vermeiden T, Schiffer R, Langhorst J, Klappe N, Asera W, Getnet G, et al. Facilitators for maternity waiting home utilisation at Attat Hospital: a mixed-methods study based on 45 years of experience. *Trop Med Int Heal*. 2018 Oct;
23. Vermeiden T, Stekelenburg J. Maternity Waiting Homes as Part of an Integrated Program for Maternal and Neonatal Health Improvements: Women’s Lives Are Worth Saving. *J Midwifery Women’s Heal*. 2017;62(2):151–4.
24. Rijn MJ Van. Factors and perceptions that influence women to use a Maternal Waiting Home ( MWH ) in Ifakara , Tanzania Maaïke Josephina van Rijn The Netherlands Master in International Health. 2013;(September).

## Tables

**Table-1 Socio-demographic characteristics result of respondents in Digelu and Tijo district, Arsi zone, south east Ethiopia, 2019 (n=530)**

| Variable       | Category | Frequency MWH utilization |           |           |
|----------------|----------|---------------------------|-----------|-----------|
|                |          | (%)( n=530                | Yes n (%) | No n (%)  |
| Age            | 20-24    | 120(22.6)                 | 29(23.2)  | 91(22.5)  |
|                | 25-29    | 197(37.2)                 | 36(28.8)  | 161(39.8) |
|                | 30-34    | 117(22.1)                 | 42(33.6)  | 75(18.5)  |
|                | >34      | 96(18.1)                  | 18(14.4)  | 78(19.3)  |
| Religion       | Orthodox | 218 (41.4)                | 52(41.6)  | 166(41.4) |
|                | Muslim   | 296 (55.8)                | 65(52.4)  | 231(57.6) |
|                | Others** | 16 (2.3)                  | 8(6.4)    | 4(1)      |
| Ethnicity      | Oromo    | 478 (90.2)                | 109(87.2) | 369(91.1) |
|                | Amhara   | 45 (8.5)                  | 16(12.8)  | 29(7.2)   |
|                | Others   | 7 (1.3)                   | 0(0)      | 7(1.7)    |
| Marital status | Married  | 504 (95.1)                | 116(92.8) | 388(95.8) |
|                | Others*  | 24 (4.9)                  | 9(7.2)    | 17(4.2)   |
| Residence      | Rural    | 459 (86.4)                | 97(77.6)  | 362(89.4) |
|                | Urban    | 71 (13.6)                 | 28(22.4)  | 43(10.6)  |

|                                      |                     |            |           |           |
|--------------------------------------|---------------------|------------|-----------|-----------|
| <b>Educational Status of Mother</b>  | no formal education | 384(72.5)  | 112(89.6) | 272(67.2) |
|                                      | Primary             | 91(17.2)   | 9(7.2)    | 82(20.2)  |
|                                      | Secondary           | 37(7)      | 4(3.2)    | 33(8.1)   |
|                                      | College and above   | 18(3.4)    | 0(0)      | 18(4.4)   |
| <b>Educational Status of Husband</b> | no formal education | 341 (64.3) | 99(79.2)  | 242(59.8) |
|                                      | Primary             | 102 (19.2) | 18(14.4)  | 84(20.7)  |
|                                      | Secondary           | 62 (11.7)  | 8(6.4)    | 54(13.3)  |
|                                      | College and above   | 25 (4.7)   | 0(0)      | 25(6.2)   |
| <b>Occupation</b>                    | Housewife           | 388(73.2)  | 72(57.6)  | 316(78)   |
|                                      | Daily laborer       | 40(7.5)    | 20(16)    | 20(4.9)   |
|                                      | Farmer              | 28(5.3)    | 6(4.8)    | 22(5.4)   |
|                                      | Government employee | 54(10.2)   | 19(15.2)  | 35(8.6)   |
|                                      | Merchant            | 20(3.8)    | 8(6.4)    | 12(3)     |
| Income of household (ETB)            | <1000               | 194(36.6)  | 45(36)    | 149(36.8) |
|                                      | 1000-1500           | 117(22.1)  | 32(25.6)  | 85(21)    |
|                                      | >1500               | 219(41.3)  | 48(38.4)  | 171(42.2) |
| Distance in minutes                  | <60                 | 253(47.7)  | 104(83.2) | 149(36.8) |
|                                      | >60                 | 277(52.3)  | 21(16.8)  | 256(63.2) |
| Road types to MWH                    | All weather         | 154(29.1)  | 29(23.2)  | 125(30.9) |
|                                      | Not all weather     | 376(70.9)  | 96(76.8)  | 280(69.1) |
| Family size                          | 1-4                 | 33(26.4)   | 136(33.6) | 169(31.9) |
|                                      | 5 and above         | 92(73.6)   | 269(66.4) | 361(68.1) |

\* divorced, widow

\*\*protestant, catholic,

**Table-2 MWH utilization facility related factors among mothers who gave birth within the last 12 months in Digelu and Tijo district, Arsi zone, south east Ethiopia, 2019 (n=125).**

| Variable                 | Response | Frequency |
|--------------------------|----------|-----------|
| Private bed and mattress | Yes      | 105       |
|                          | No       | 20        |
| Screen for privacy       | Yes      | 85        |
|                          | No       | 39        |
| Space for accompanying   | Yes      | 97        |

|                           |           |           |
|---------------------------|-----------|-----------|
| family available          | No        | 28        |
| Recreational facility     | Yes       | 7         |
|                           | No        | 118       |
| Health care provider fol- | Yes       | 114       |
| low-up daily              | No        | 11        |
| Food supply available     | Yes       | 112       |
|                           | No        | 13        |
| Regular health education  | Yes       | 110       |
|                           | No        | 15        |
| Bath room availability    | Yes       | 12        |
|                           | No        | 113       |
| Mode of Access to the     | Ambulance | 86 (68.8) |
| place of MWH/for users    | On foot   | 15 (12)   |
| only                      | Stretcher | 19 (15.2) |
|                           | Cart      | 5 (4)     |

**Table-3 Reproductive/obstetrics history and socio-cultural related factors in Digelu and tijo district, Arsi Zone, south east Ethiopia, 2019 (n 530)**

| Variable                             | Category        | Frequency<br>(%)( n=530) | MWH Utilization |           |
|--------------------------------------|-----------------|--------------------------|-----------------|-----------|
|                                      |                 |                          | Yes             | No        |
| Number of preg-<br>nancy             | 1               | 85(160)                  | 14(11.2)        | 71(17.5)  |
|                                      | 2-4             | 251(47.4)                | 54(43.2)        | 197(48.6) |
|                                      | 5 and above     | 194(36.6)                | 57(45.6)        | 137(33.8) |
| Number of deliver-<br>ies            | 1-3             | 278 (52.5)               | 46(37.6)        | 231(57)   |
|                                      | >3              | 253(47.7)                | 78(62.4)        | 174(43)   |
| ANC use                              | Yes             | 333(62.8)                | 61(48.8)        | 272(67.2) |
|                                      | No              | 197(37.2)                | 64(51.2)        | 133(32.8) |
| Danger sign during<br>pregnancy.     | Yes             | 77(14.5)                 | 31(24.8)        | 46(11.4)  |
|                                      | No              | 453(85.5)                | 94(75.2)        | 359(88.6) |
| Place of delivery<br>for recent baby | Health facility | 324(61.1)                | 121(96.8)       | 203(50.1) |
|                                      | Home            | 206(38.9)                | 4(3.2)          | 202(49.9) |
| Decision making                      | Yes             | 161(30.4)                | 61(48.8)        | 100(24.7) |

|                          |     |           |           |           |
|--------------------------|-----|-----------|-----------|-----------|
| power                    | No  | 369(69.6) | 64(51.2)  | 305(75.3) |
| Community influence      | Yes | 25(4.7)   | 7(5.6)    | 18(4.4)   |
|                          | No  | 505(95.3) | 118(23.4) | 387(95.6) |
| Miss-treatment of mother | Yes | 16(3)     | 2(1.6)    | 14(3.5)   |
|                          | No  | 514(97)   | 123(98.4) | 391(96.5) |

**Table-4: Multivariate analysis factors associated with MWH utilization, Digelu and Tijo district, 2019**

| Variables                 | Categories | MWH utilization |     | COR 95% CI      | AOR 95% CI       | p-value |
|---------------------------|------------|-----------------|-----|-----------------|------------------|---------|
|                           |            | Yes             | NO  |                 |                  |         |
| Residence                 | rural      | 97              | 362 | 0.412(0.24-0.7) | 1.24(0.63-2.45)  | 0.53    |
|                           | urban      | 28              | 43  | 1               | 1                |         |
| Occupation                | housewife  | 72              | 316 | 2.61(1.7-1-4)   | 1.53(0.89-2.62)  | 0.12    |
|                           | other      | 53              | 89  | 1               | 1                |         |
| Traveling time in minutes | <=60       | 104             | 149 | 0.12(0.07-0.2)  | 0.16(0.09-0.27)* | 0.001   |
|                           | >60        | 21              | 256 | 1               | 1                |         |
| decision making           | Yes        | 61              | 100 | 2.9(1.9-4.4)    | 1.81(1.10-2.96)* | 0.02    |
|                           | No         | 64              | 305 | 1               | 1                |         |
| Number of deliveries      | 1-3        | 47              | 231 | 1               | 1                | 0.02    |
|                           | >3         | 78              | 174 | 0.45(0.3-.0.68) | 0.56(0.34-0.90)* |         |
| ANC use                   | Yes        | 61              | 272 | 1               | 1                | 0.04    |
|                           | No         | 64              | 133 | 0.47(.31-0.70)  | 0.6(0.37-0.97)*  |         |

\*p-value <0.05

## Figures



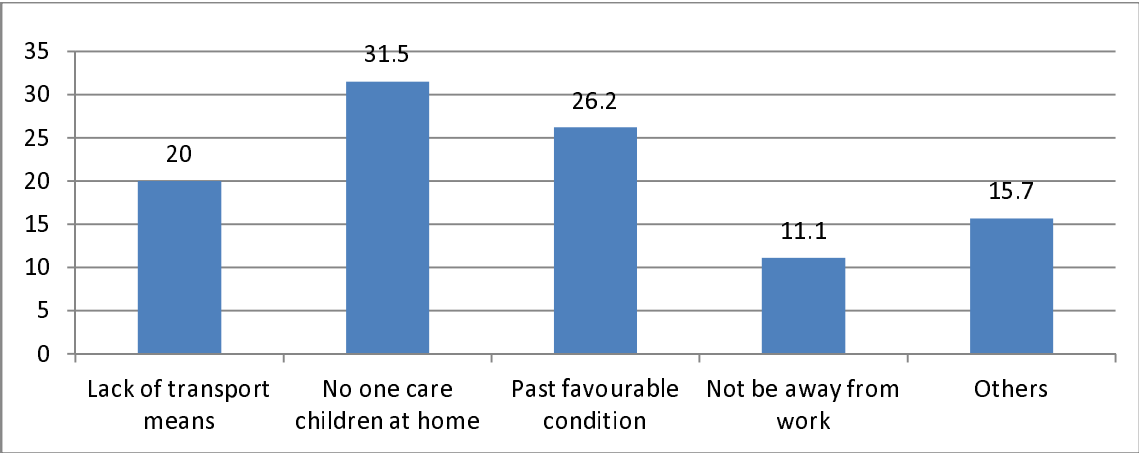

**Figure-1 Reason why did not used MWH among mothers who gave birth within the last 12 months in Digelu and Tijo district, Arsi zone, south east Ethiopia, 2019 (n=405).**
